# Supplementary material for: Cation-induced molecular orbital modulations and supramolecular formation of a 15-crown-5-substituted tribenzotetraazachlorin-C60 conjugate
Source: Royal Society of Chemistry journal article supplement (doi:10.1039/b902982f), 2009-01-01
Supplement: b902982f.pdf [file b902982f.pdf]

### Supporting Information

<sup>1</sup>H NMR spectrum of **1**.

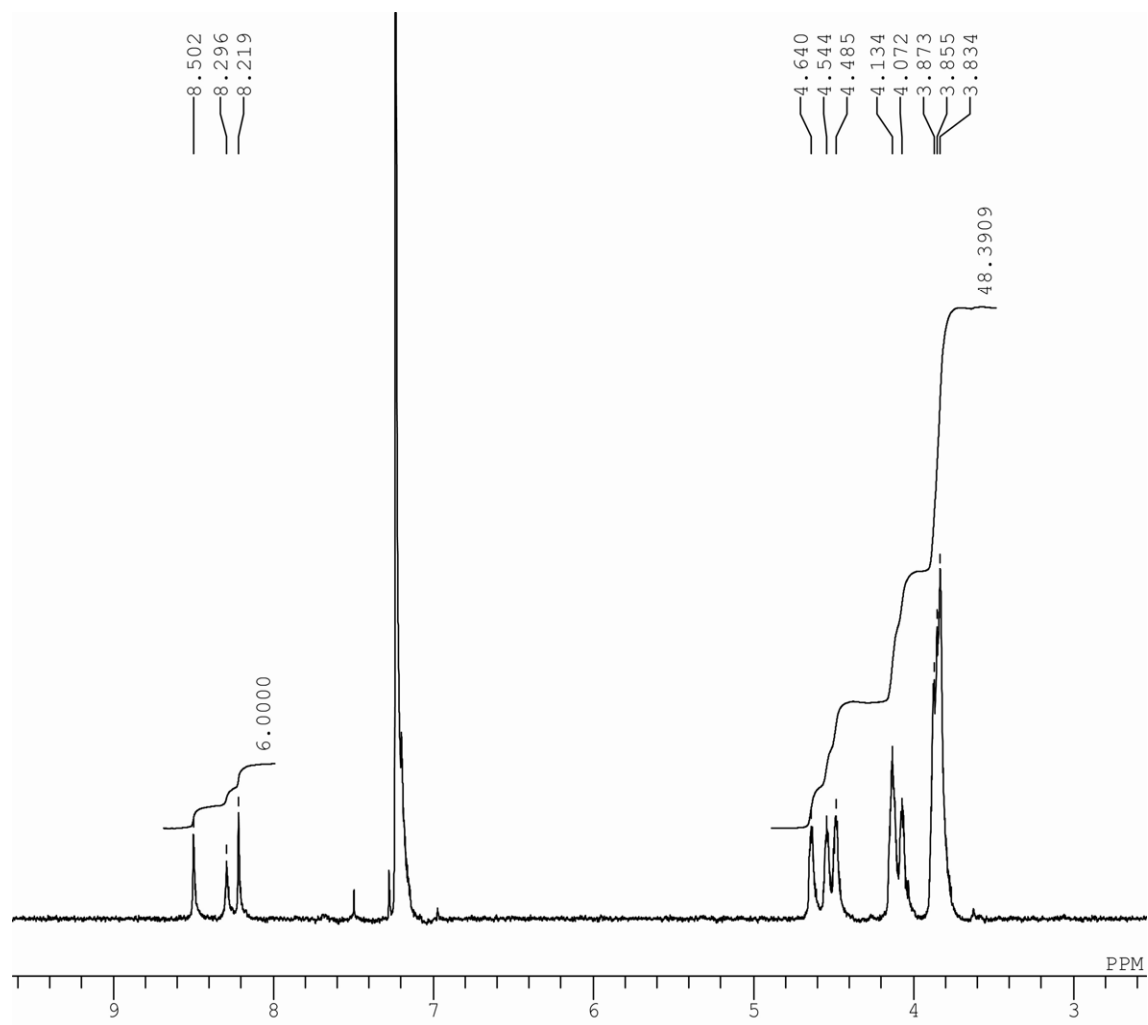

ESI-TOF mass spectra of **1** in  $\text{CHCl}_3/\text{MeOH} = 1:1$  in the presence of  $\text{K}^+$  at  $[\text{K}^+]/[\mathbf{1}] = \text{ca. } 1$ .

Acq. Data Name: 08121511 Experiment Date/Time: 12/15/2008 3:56:24 PM  
Creation Parameters: Average(MS[1] Time:0.04..0.98) Ionization Mode: ColdSpray+

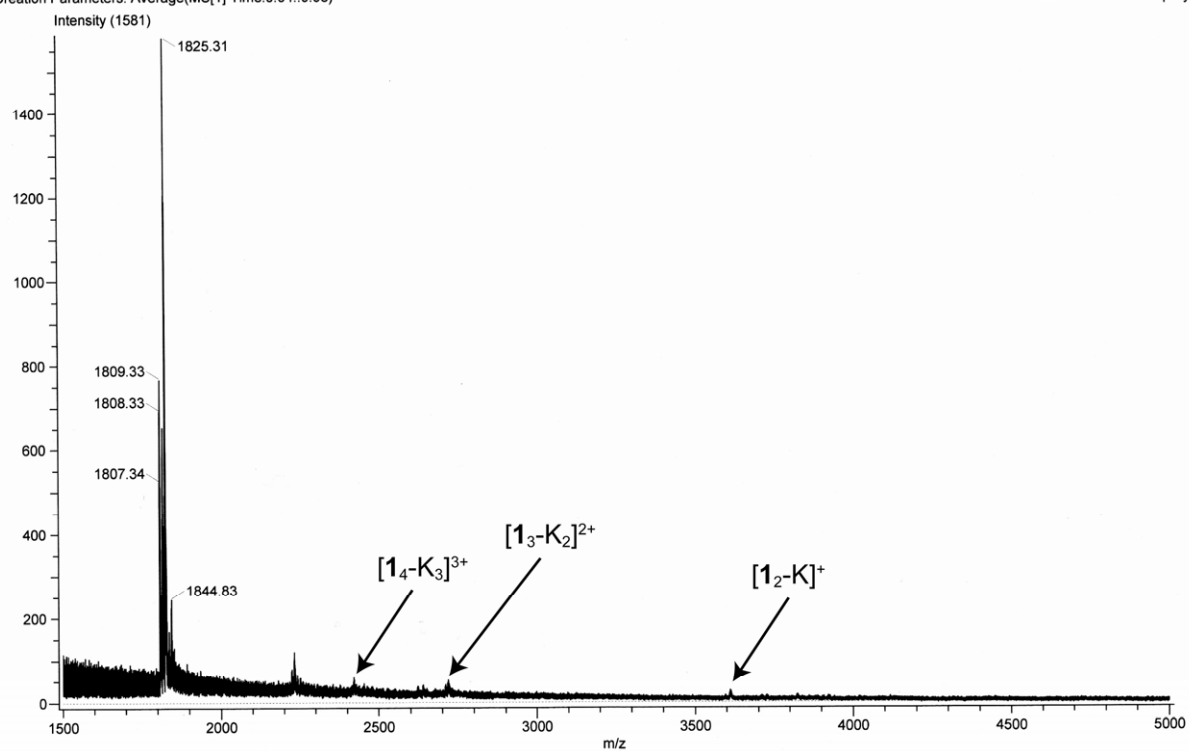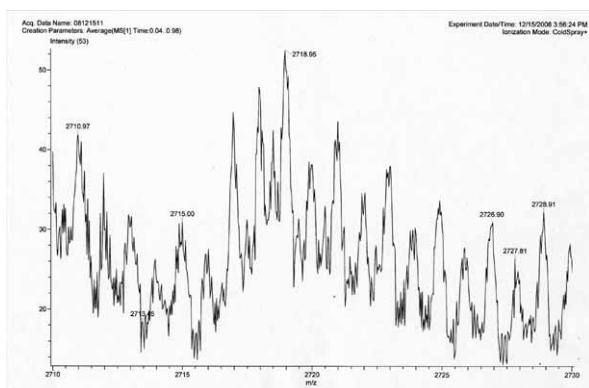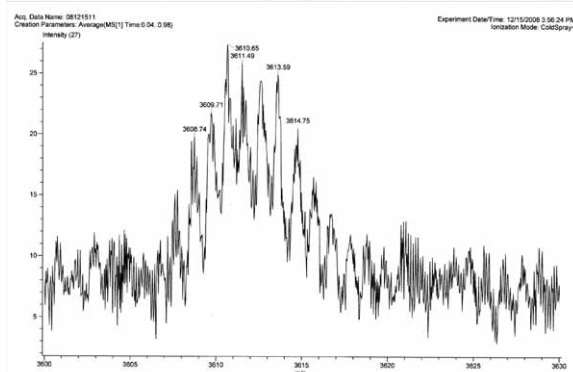

ESI-TOF mass spectra of **1** in CHCl<sub>3</sub>/MeOH = 1:1 in the presence of K<sup>+</sup> at [K<sup>+</sup>]/[**1**] = ca. 100.

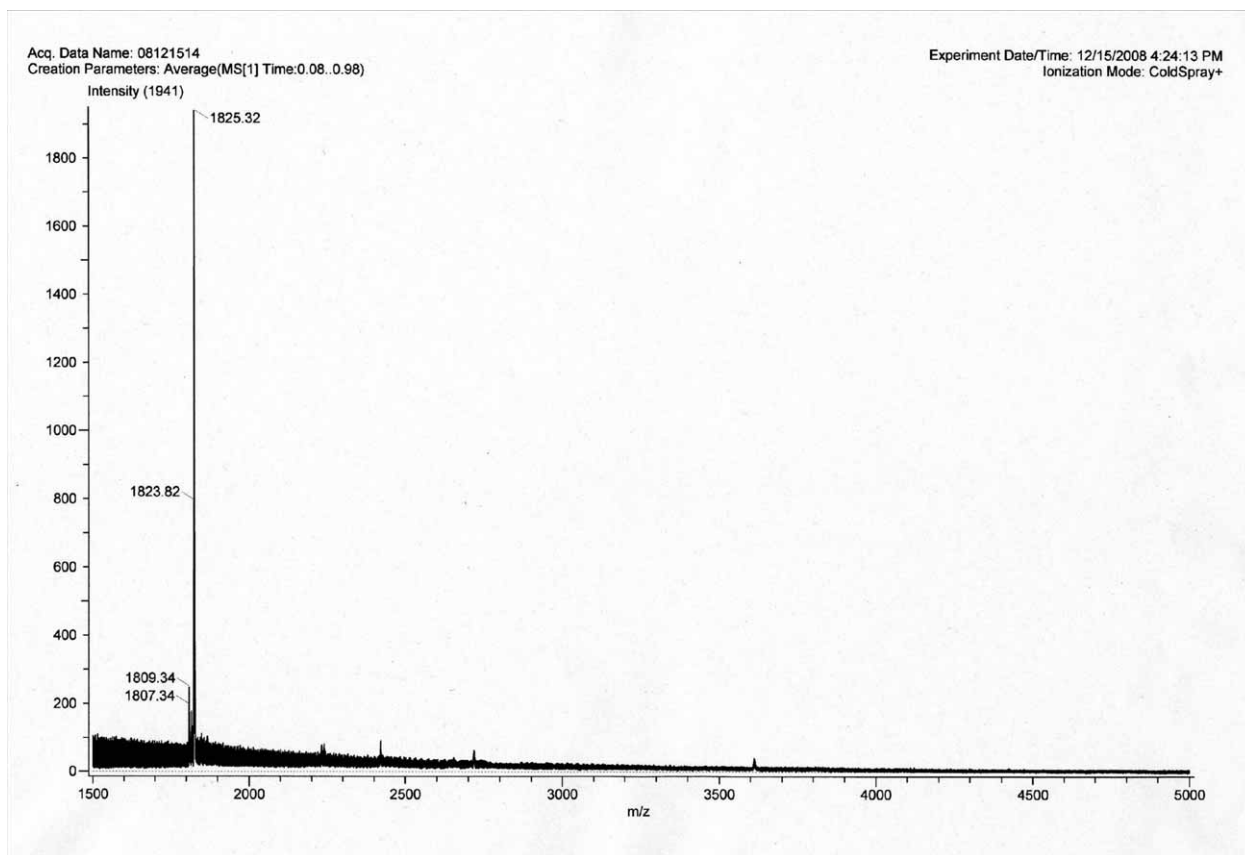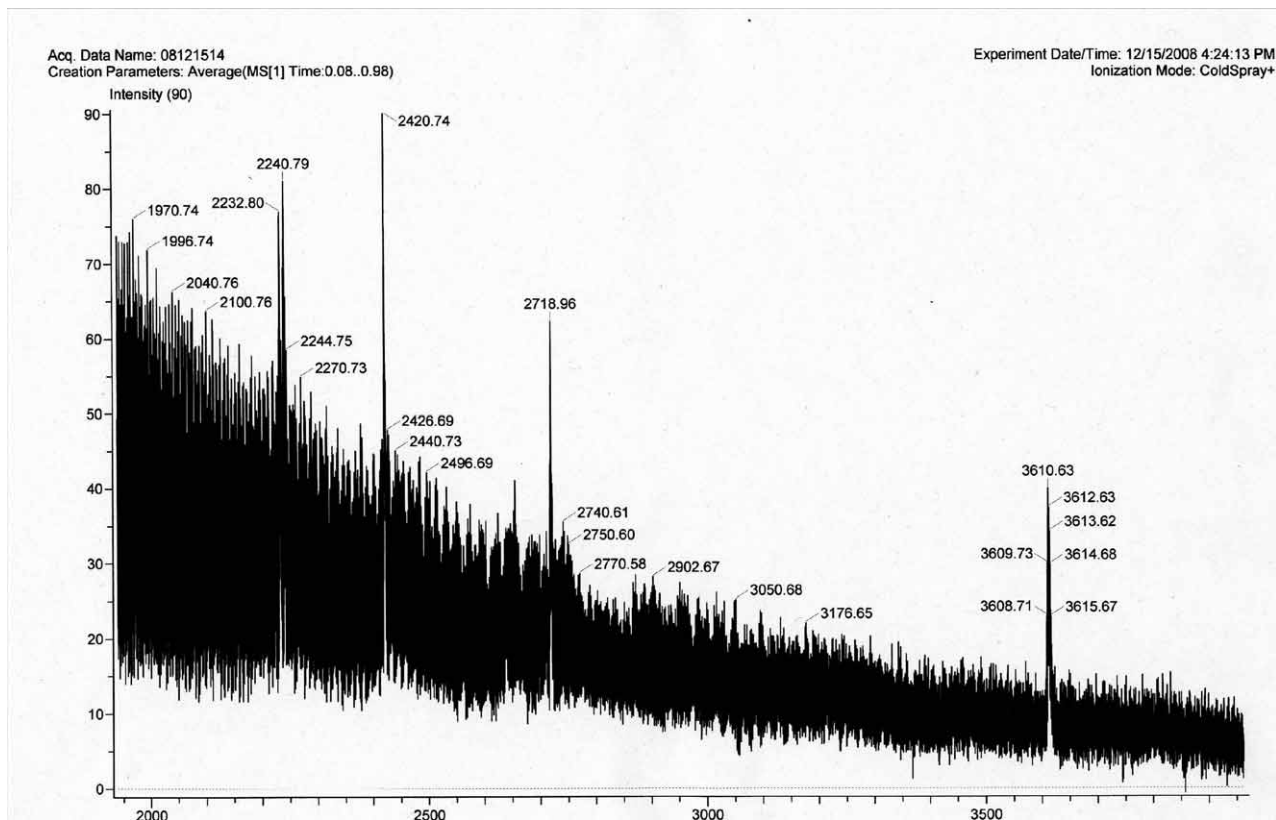

Determination of  $K_1$  and  $K_2$ .

Define the step complex formation constants,  $K_1$  and  $K_2$ , as

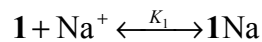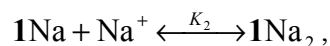

$$K_1 = \frac{[\mathbf{1Na}]}{[\mathbf{1}][\text{Na}]}, \quad K_2 = \frac{[\mathbf{1Na}_2]}{[\mathbf{1Na}][\text{Na}]}.$$

Therefore,

$$[\mathbf{1Na}] = K_1 [\mathbf{1}][\text{Na}], \quad [\mathbf{1Na}_2] = K_1 K_2 [\mathbf{1}][\text{Na}]^2.$$

The initial molar concentration of  $\mathbf{1}$  (or total concentration of  $\mathbf{1}$ ) can be defined as

$$\begin{aligned} S &= [\mathbf{1}] + [\mathbf{1Na}] + [\mathbf{1Na}_2] = [\mathbf{1}] + K_1 [\mathbf{1}][\text{Na}] + K_1 K_2 [\mathbf{1}][\text{Na}]^2 \\ &= (1 + K_1 [\text{Na}] + K_1 K_2 [\text{Na}]^2) [\mathbf{1}] \end{aligned}$$

The molar fraction of  $[\mathbf{1Na}_2]$  can be written as

$$f = \frac{[\mathbf{1Na}_2]}{S} = \frac{K_1 K_2 [\text{Na}]^2}{1 + K_1 [\text{Na}] + K_1 K_2 [\text{Na}]^2}.$$

A curve fitting of the experimentally obtained relationship between  $f$  and  $[\text{Na}]$  (Fig. S1, square plots) by using the above formula (red curve) gave two undetermined coefficients,  $K_1$  and  $K_2$ . Accordingly,  $\log K_1$  and  $\log K_2$  are estimated to be 5.39 and -1.00, respectively.

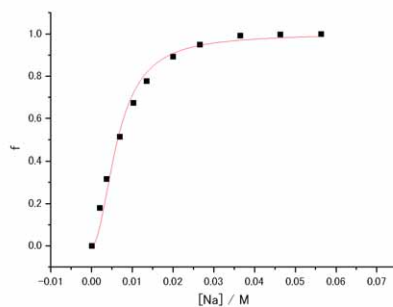

**Figure S1** Plot of molar fraction of  $\mathbf{1}$  against  $[\text{Na}]$ . Result of the curve fitting procedure is depicted by the red curve.
